# Supplementary material for: Organic polymeric filler-amorphized poly(ethylene oxide) electrolyte enables all-solid-state lithium–metal batteries operating at 35 °C
Source: Royal Society of Chemistry journal article supplement (doi:10.1039/d0ta00335b), 2020-01-01
Supplement: d0ta00335b1.pdf [file d0ta00335b1.pdf]

## Supporting Information

### **Organic polymeric filler-amorphized poly(ethylene oxide) electrolyte enables all-solid-state lithium-metal batteries operating at 35 °C**

*Gulian Wang,<sup>a†</sup> Xingyu Zhu,<sup>a†</sup> Arif Rashid,<sup>a</sup> Zhongli Hu,<sup>a</sup> Pengfei Sun,<sup>a</sup> Qiaobao Zhang<sup>\*b</sup> and Li Zhang<sup>\*a</sup>*

<sup>a</sup> *College of Energy, Soochow Institute for Energy and Materials InnovationS, Soochow University, Suzhou 215006, China. E-mail: zhangli81@suda.edu.cn*

<sup>b</sup> *Department of Materials Science and Engineering, College of Materials, Xiamen University, Xiamen 361005, Fujian, China. E-mail: zhangqiaobao@xmu.edu.cn*

<sup>†</sup>*These authors contributed equally to this work.*

## Supplementary Figures

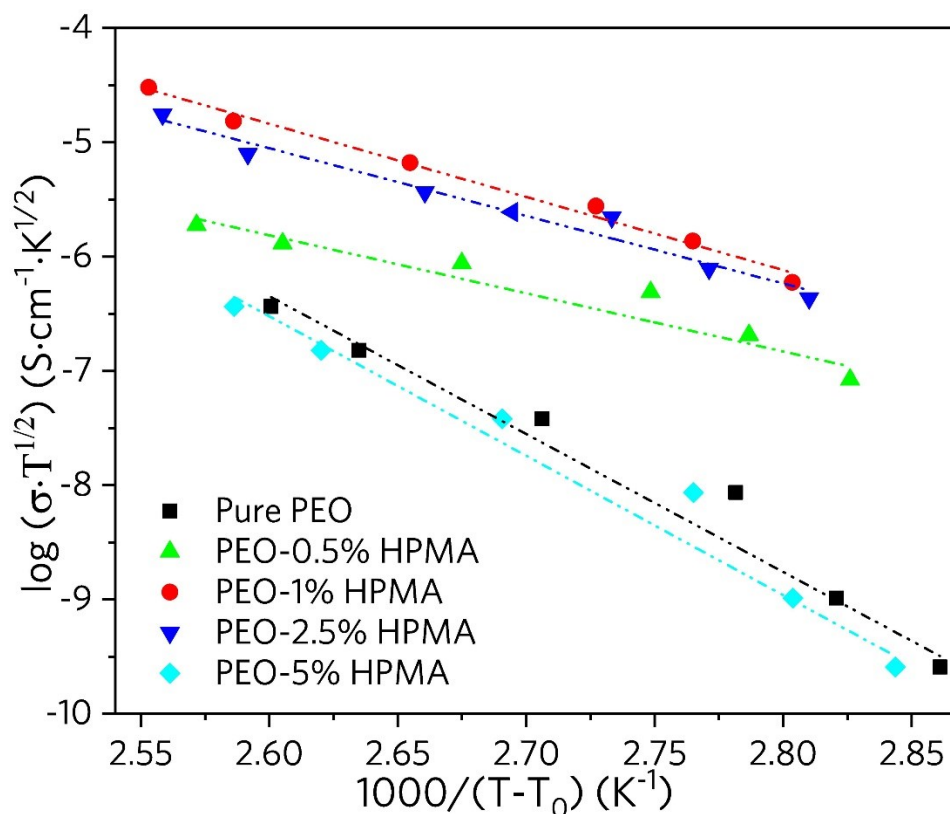

**Figure S1.** Plots of  $\log(\sigma \cdot T^{1/2})$  vs.  $1000/(T-T_0)$  of the pristine PEO and PEO-HPMA SPEs with different HPMA dosages.

As displayed in Figure 3a, the plots of  $\log \sigma$  versus  $T^{-1}$  for the pristine PEO and PEO-HPMA SPEs with different HPMA dosages present a non-linear relationship, which can be further described by the Vogel-Tamman-Fulcher (VTF) empirical equation (Ref: *Angew. Chem. Int. Ed.*, 2018, **57**, 10168-10172)

$$\sigma = \sigma_0 T^{-1/2} \exp\left(-\frac{E_a}{T-T_0}\right)$$

Where  $\sigma_0$  is the pre-exponential factor,  $E_a$  is the activation energy,  $T_0$  is a parameter correlated to the glass transition temperature  $T_g$ , and  $R$  is the ideal gas constant. Herein, we use the  $T_g$  values obtained from the DSC tests (Figure 2e) to approximate the  $T_0$ . By linearly fitting the  $\log(\sigma \cdot T^{1/2})$  vs.  $1000/(T-T_0)$  relationship, the  $E_a$  of the PEO-1%HPMA SPE is calculated to be 0.53 eV, while the pristine PEO shows a much higher value of 1.01 eV. Generally, a lower  $E_a$  represents  $\text{Li}^+$  ions that requires less energy when moving in the electrolyte, *i.e.*, a higher ionic conductivity.

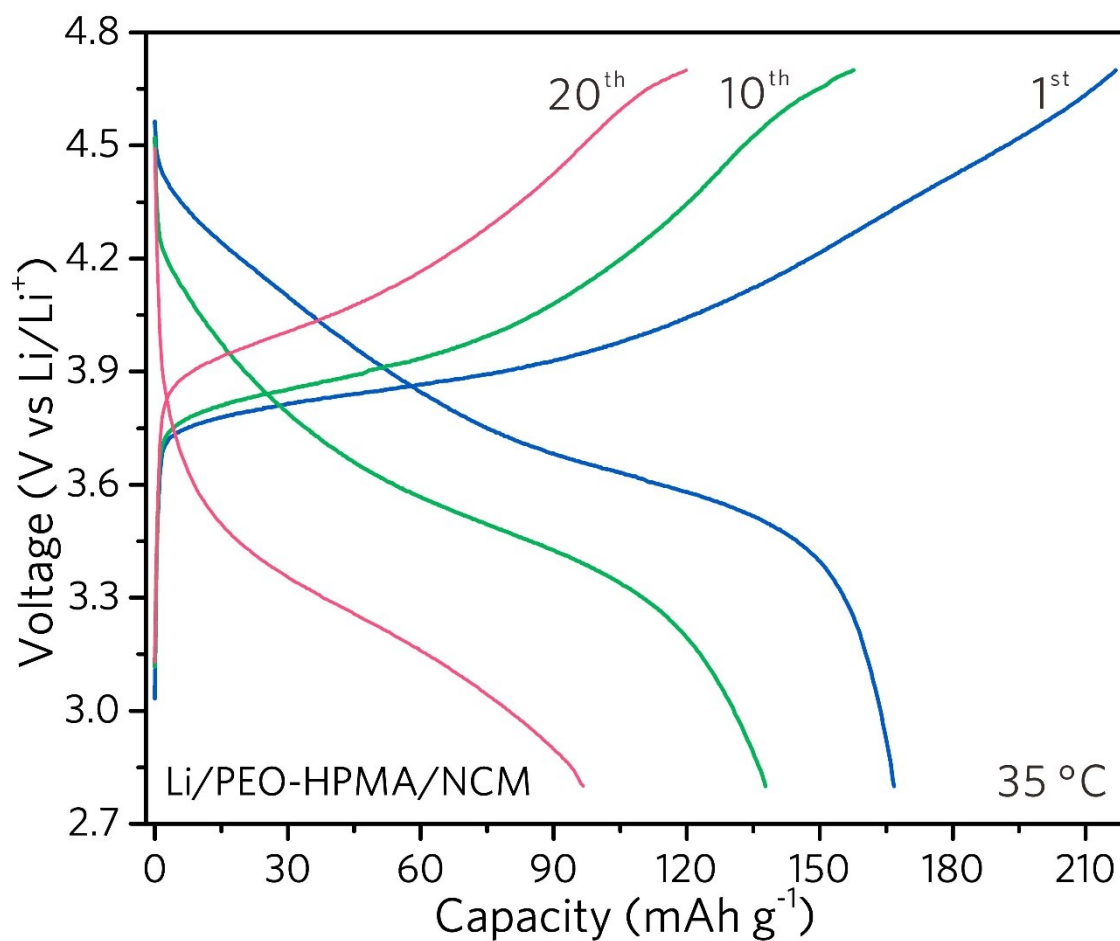

**Figure S2.** Charge/discharge profiles of the Li/PEO-1% HPMA/LiNi<sub>0.5</sub>Co<sub>0.2</sub>Mn<sub>0.3</sub>O<sub>2</sub> cell after various cycles at 0.1 C.

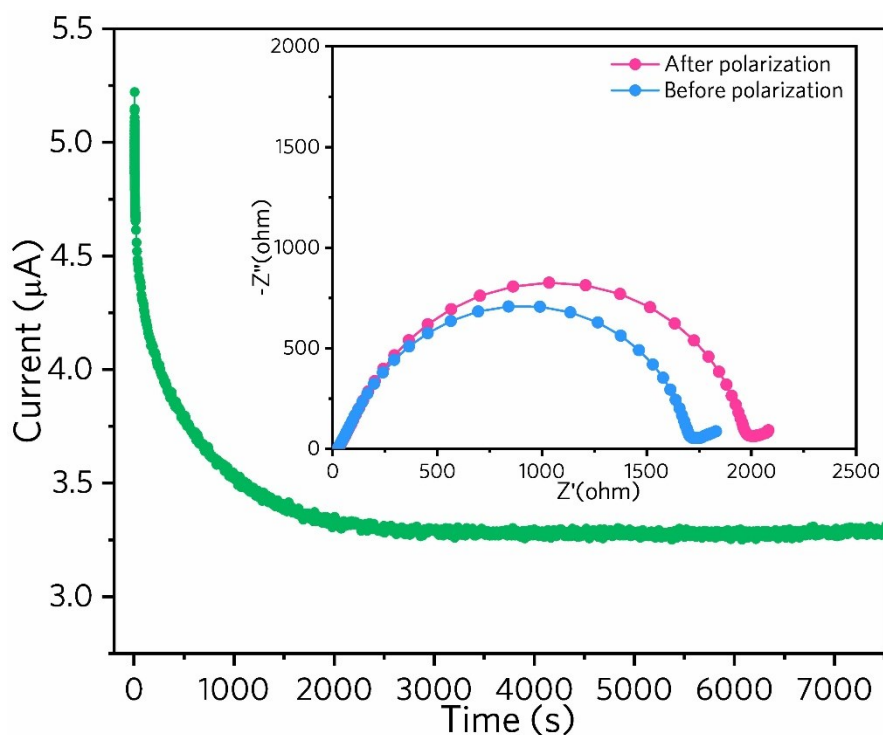

**Figure S3.** The chronoamperometry profile of a symmetrical Li/PEO-1% HPMA/Li cell under a polarization voltage of 10 mV. The inset shows the Nyquist profiles of the cell before and after the chronoamperometry test.

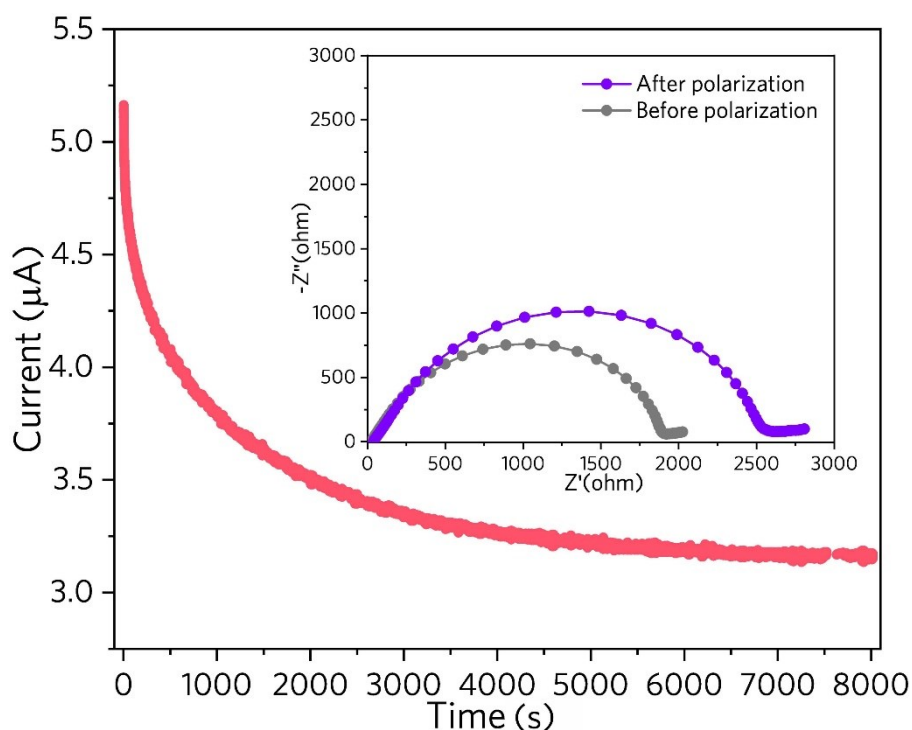

**Figure S4.** The chronoamperometry profile of a symmetrical Li/PEO/Li cell under a polarization voltage of 10 mV. The inset shows the Nyquist profiles of the cell before and after the chronoamperometry test.

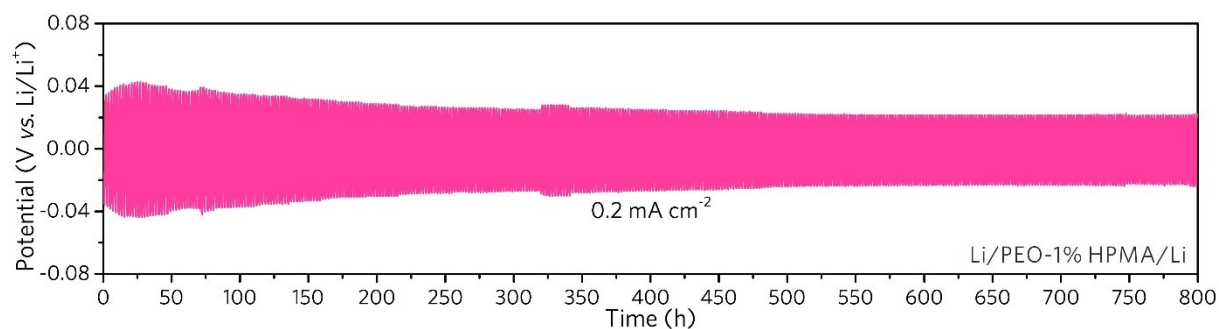

**Figure S5.** Voltage versus time profile of the symmetrical Li/PEO-1% HPMA/Li cell during the repeated Li plating/stripping process at current densities of  $0.2 \text{ mA cm}^{-2}$ .

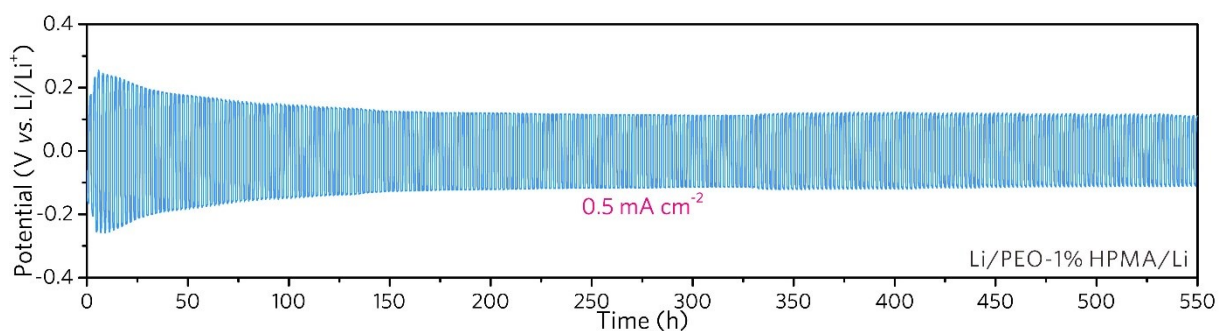

**Figure S6.** Voltage versus time profile of the symmetrical Li/PEO-1% HPMA/Li cell during the repeated Li plating/stripping process at current densities of  $0.5 \text{ mA cm}^{-2}$ .

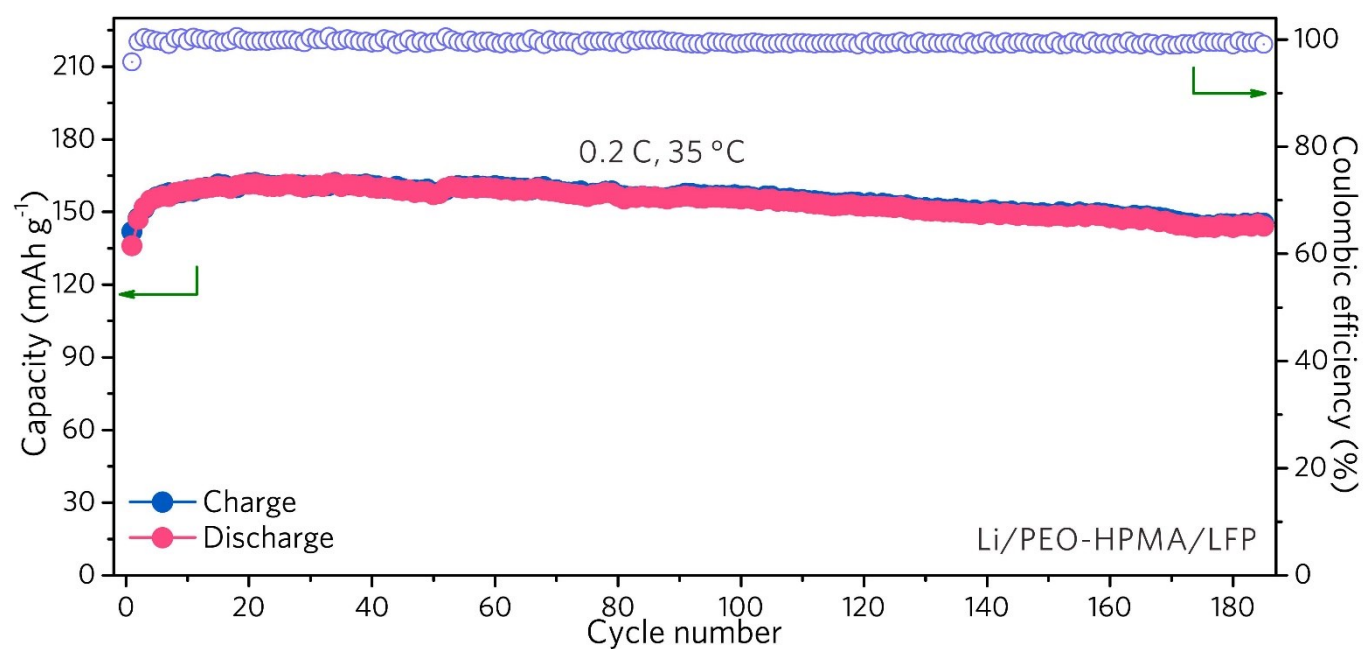

**Figure S7.** Long-term cycling stability of the Li/PEO-HPMA/LFP cell in a potential range of 2.6-4.3 V at a current rate of 0.2 C and corresponding Coulombic efficiency vs. cycle number profile.

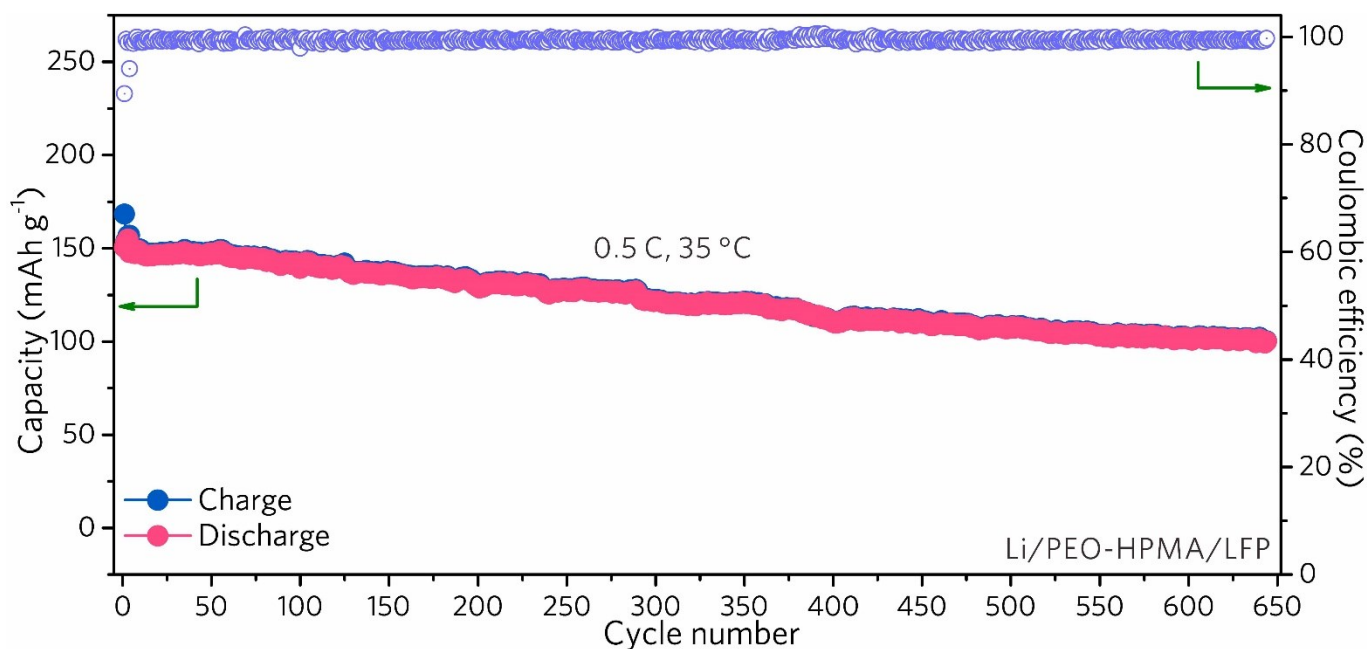

**Figure S8.** Long-term cycling stability of the Li/PEO-HPMA/LFP cell in a potential range of 2.6-4.3 V at a current rate of 0.5 C and corresponding Coulombic efficiency vs. cycle number profile.

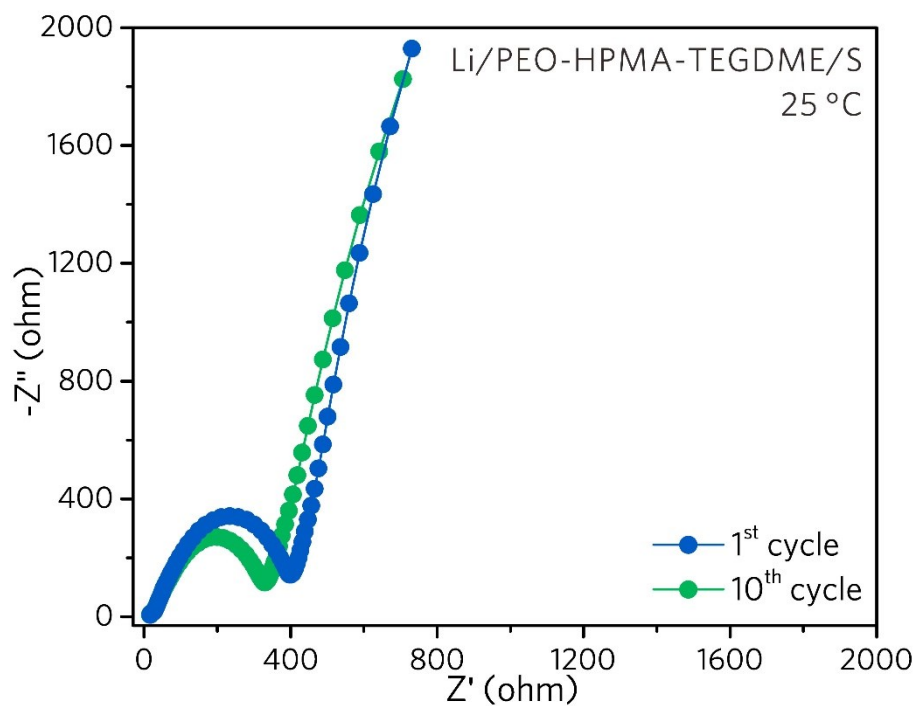

**Figure S9.** Nyquist plot of the quasi-solid-state Li-S battery after cycling for 1 and 10 cycles, respectively.

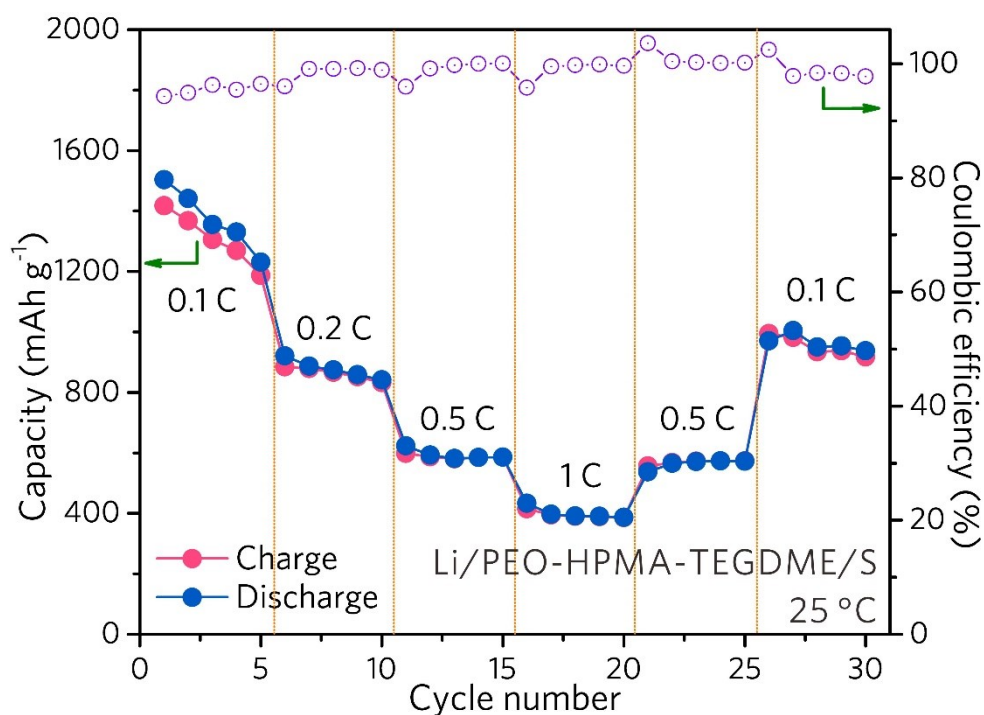

**Figure S10.** Rate capability of Li/PEO-HPMA-TEGDME/S cells at various current rates from 0.1 to 1 C (1C= 1675 mA g<sup>-1</sup>).

**Table S1.** Comparison of the ionic conductivity, electrochemical performance and operating temperature between our PEO-HPMA SPE and the state-of-the-art PEO-based SPEs in the literatures.

| PEO-based SPEs                                  | Ionic conductivity<br>(S cm <sup>-1</sup> )                      | Active materials                                                       | Electrochemical performance and operating temperature                                                                                             | Refs      |
|-------------------------------------------------|------------------------------------------------------------------|------------------------------------------------------------------------|---------------------------------------------------------------------------------------------------------------------------------------------------|-----------|
| <b>PEO/LiTFSI+<br/>HPMA</b>                     | 1.13*10 <sup>-4</sup> at 35 °C<br>2.16*10 <sup>-4</sup> at 45 °C | LiFePO <sub>4</sub>                                                    | 160.3, 150.5 and 143.8 mAh·g <sup>-1</sup> at 0.1, 0.5 and 1 C, <b>35 °C</b><br>144.1 mAh·g <sup>-1</sup> after 185 cycles at 0.2 C, <b>35 °C</b> | This work |
| PEO/LiTFSI+<br>BaTiO <sub>3</sub> nanospheres   | 1.8*10 <sup>-5</sup> at 25 °C<br>1.6*10 <sup>-3</sup> at 80 °C   | LiFePO <sub>4</sub>                                                    | 135.6 mAh·g <sup>-1</sup> at 0.1C, <b>80 °C</b><br>97.5% capacity retention after 50 cycles                                                       | [1]       |
| LiClO <sub>4</sub> /PEO+<br>LLTO nanofiber      | 4.01*10 <sup>-4</sup> at 60 °C                                   | LiFePO <sub>4</sub>                                                    | 140 mAh·g <sup>-1</sup> at 1C, <b>60 °C</b><br>92.4% capacity retention after 100 cycles                                                          | [2]       |
| PEO/LiTFSI+<br>LLZO NWs                         | 2.39*10 <sup>-4</sup> at 25 °C<br>1.15*10 <sup>-3</sup> at 60 °C | LiFePO <sub>4</sub>                                                    | 158.7 mAh·g <sup>-1</sup> after 80 cycles at 0.1 C, <b>45 °C</b><br>158.8 mAh·g <sup>-1</sup> after 70 cycles at 0.5 C, <b>60 °C</b>              | [3]       |
| PEO/LiTFSI<br>+ nanoporous<br>SSZ-13            | 1.91*10 <sup>-3</sup> at 60 °C<br>4.43*10 <sup>-5</sup> at 20 °C | LiFePO <sub>4</sub>                                                    | 130 mAh·g <sup>-1</sup> after 100 cycles at 1C, <b>58 °C</b>                                                                                      | [4]       |
| PEO/LiTFSI<br>+ g-C <sub>3</sub> N <sub>4</sub> | 1.7*10 <sup>-5</sup> at 30 °C                                    | LiFePO <sub>4</sub>                                                    | 155 mAh·g <sup>-1</sup> after 100 cycles at 0.2 C, <b>60 °C</b>                                                                                   | [5]       |
| PEO/LiTFSI + LAGP                               | --                                                               | LiFePO <sub>4</sub>                                                    | ~120 mAh·g <sup>-1</sup> at 1C and 70% retention after 500 cycles, <b>30 °C</b>                                                                   | [6]       |
| PEO/LiTFSI<br>+7.5%LLZO                         | 5.5*10 <sup>-4</sup> at 30 °C                                    | LiFePO <sub>4</sub>                                                    | ~150 mAh·g <sup>-1</sup> at 0.1 C, <b>60 °C</b>                                                                                                   | [7]       |
| PEO/LiTFSI+<br>LSTZ                             | 3.5*10 <sup>-4</sup> at 45 °C                                    | LiNi <sub>0.8</sub> Mn <sub>0.1</sub> Co <sub>0.1</sub> O <sub>2</sub> | 151, 125 and 100 mAh·g <sup>-1</sup> delivered at 50,100 and 150 uA·cm <sup>-2</sup> , <b>45 °C</b>                                               | [8]       |
| PEO/LiTFSI+<br>LSTZ                             | 3.5*10 <sup>-4</sup> at 45 °C                                    | LiFePO <sub>4</sub>                                                    | 156, 149 and 128 mAh·g <sup>-1</sup> delivered at 50,100 and 200 uA·cm <sup>-2</sup> , <b>45 °C</b>                                               | [8]       |

### References in Table S1.

- (1) Y. Zhang, X. Wang, W. Feng, Y. Zhen, P. Zhao, Z. Cai and L. Li, *Ionics*, **2018**, *25*, 1471.



- (2) K.-Q. He, J.-W. Zha, P. Du, S.-H. Cheng, C. Liu, Z.-M. Dang and R. K. Li, *Dalton Trans.*, DOI: 10.1039/C9DT00074G.
- (3) Z. Wan, D. Lei, W. Yang, C. Liu, K. Shi, X. Hao, L. Shen, W. Lv, B. Li, Q.-H. Yang, F. Kang and Y.-B. He, *Adv. Funct. Mater.*, **2019**, *29*, 1805301.
- (4) W. Li, S. Zhang, B. Wang, S. Gu, D. Xu, J. Wang, C. Chen and Z. Wen, *ACS Appl. Mater. Interfaces*, **2018**, *10*, 23874.
- (5) Z. Sun, Y. Li, S. Zhang, L. Shi, H. Wu, H. Bu and S. Ding, *J. Mater. Chem. A*, DOI: 10.1039/C9TA00634F.
- (6) C. Fu, S. Lou, Y. Cao, Y. Ma, C. Du, P. Zuo, X. Cheng, W. Tang, Y. Wu, Y. Gao, H. Huo and G. Yin, *Electrochim. Acta*, **2018**, *283*, 1261.
- (7) F. Chen, D. Yang, W. Zha, B. Zhu, Y. Zhang, J. Li, Y. Gu, Q. Shen, L. Zhang and D. R. Sadoway, *Electrochim. Acta*, **2017**, *258*, 1106.
- (8) H. Xu, P.-H. Chien, J. Shi, Y. Li, N. Wu, Y. Liu, Y.-Y. Hu and J. B. Goodenough, *PNAS*, **2019**, *116*, 18815.
